# Supplementary material for: The prognostic value of tumor-infiltrating lymphocytes in colorectal cancer differs by anatomical subsite: a systematic review and meta-analysis
Source: World J Surg Oncol. 2019 May 22;17:85. doi: 10.1186/s12957-019-1621-9 (PMC6532263; doi:10.1186/s12957-019-1621-9)
Supplement: Supplementary file 1 — Table S1. General characteristics of the studies included in this meta-analysis (XLSX 15 kb) [file 12957_2019_1621_MOESM1_ESM.xlsx]

## Sheet: Sheet1
Table S1 General characteristics of the studies included in this meta-analysis
First author and published year	NO.of.	Tumour location	Counting site	T cell subsets analysed	Cut off point	Tumour stage(TNM)	Outcome index	Analysis method
	patient
Lee et al 2013		Colon	NA	CD8+	Mean	Ⅳ	OS	MA
	79			CD45RO+
				Foxp3+
Correale et al 2012	57	Colon	ST	Foxp3+	>30 cells/field	Ⅳ	DFS OS	MA
Eriksen et al 2018	573	Colon	IM	CD3+	>350cells/mm2	Ⅱ	RFS OS	MA
				CD8+	>200cells/mm2
Flaherty et al 2016	89	Colon	TC IM	CD3+ CD4+ CD8+ Foxp3+	Median	ⅠⅡⅢ	DFS	MA
				CD3+/Foxp3+	>25thpercentile
Guidoboni et al 2001	109	Right-sided	TC	CD3+	Median	Ⅱ Ⅲ	OS DFS	MA
		Colon		CD8+
Huang et al 2018	876	Colon	TC	CD8+	All quartiles	Ⅱ Ⅲ	DFS	MA
Lee et al 2010	87	Colon	ST TC	Foxp3+	Median	Ⅱ	OS DFS	MA
				CD3+
				CD45RO+
Markl et al 2017	136	Colon	IM	Foxp3+	>70cells/ mm2	ⅠⅡ	CSS	K-M
Berntsson et al 2017	557	Right colon; Left colon;	TC+ST	CD3+	Median	ⅠⅡ Ⅲ Ⅳ	OS	MA
		Rectum		CD8+
				Foxp3+
Prall et al 2004	79	Colon	IM	CD8+	>66thpercentile	Ⅲ	RFS OS	MA
Richards et al 2014	365	Colon;	IM ST TC	CD3+	Median	ⅠⅡ Ⅲ	CSS	MA
		Rectum		CD8+
Salama et al 2012	165	Colon	TC+IM	Foxp3+	NA	Ⅱ	CSS	UA
Sellitto et al 2011	47	Colon	Blood	CD4+CD25+Foxp3+	>4.48%	ⅠⅡ Ⅲ Ⅳ	OS	MA
Siniorope et al 2009	160	Colon	TC ST	CD3+/Foxp3+	Bottom quartile	Ⅱ Ⅲ	OS DFS	MA
Xu et al 2013	90	Colon	TC	Foxp3+	Median	ⅠⅡ Ⅲ Ⅳ	OS	MA
Yoon et al 2012	216	Colon	TC ST	Foxp3+	Median	Ⅱ Ⅲ	OS	MA
				CD8+
Zeestraten et al 2014	285	Colon	TC	Foxp3+	Median	ⅠⅡ Ⅲ Ⅳ	OS DFS	UA
Anitei et al 2014	111	Rectum	TC+IM	CD3+	CD3+(TC): >256cells/mm2	ⅠⅡ Ⅲ Ⅳ	OS DFS	MA
				CD8+	CD8+(TC): >202cells/ mm2
					CD3+(IM): >144cells/ mm2
					CD8+(TC): >50cells/ mm2
Cianchi et al 2002	84	Rectum	TC	Total	>45 microvessels	ⅠⅡ	OS	MA
Reimers et al 2014	495	Rectum	TC	Foxp3+	Median	Ⅰ Ⅱ Ⅲ Ⅳ	OS DFS	MA
Ling et al 2014	412	Colon	TC IM	Foxp3+	>2 scores	ⅠⅡ Ⅲ Ⅳ	CSS	MA
Szynglarewicz et al 2007	45	Rectum	IM	Total TILs	NA	Ⅱ Ⅲ	RFS	MA
Abbreviations: OS=overall survival; DFS=disease free survival; CSS=cancer specific survival; NA=not available; TC=tumour centre; IM=invasive margin; ST=tumour stroma; MA=multivariate analysis; UA=univariate analysis; K-M=kaplan-meier; TILs=tumour infiltrating lymphocytes; Foxp3+=Forkhead box P3; TC+ST=the immunoscore including tumour infiltrating lymphocytes score of tumour centre and tumour stro…
