# Supplementary material for: The prognostic value of tumor-infiltrating lymphocytes in colorectal cancer differs by anatomical subsite: a systematic review and meta-analysis
Source: World J Surg Oncol. 2019 May 22;17:85. doi: 10.1186/s12957-019-1621-9 (PMC6532263; doi:10.1186/s12957-019-1621-9)
Supplement: Supplementary file 2 — Table S2. The quality assessment of all included studies in this meta-analysis (XLSX 12 kb) [file 12957_2019_1621_MOESM2_ESM.xlsx]

## Sheet: Sheet1
Table S2 The quality assessment of all included studies in this meta analysis
Study	Was the population under study defined with in- and exclusion criteria?	Were patient data prospectively collected?	Were the main prognostic patient and tumor characteristics presented?	Was the IHC or HE staining protocol specified?	Were stainings evaluated by > 1 observer?	Was the study endpoint defined?	Was the time of follow up specified?	Was loss during analysis or follow up described？	Quality rating
Lee et al 2013	1	0	1	1	0	0	1	0	4
Correale et al 2012	1	1	0	1	0	1	1	0	5
Eriksen et al 2018	1	1	1	1	0	1	1	0	6
Flaherty et al 2016	1	0	1	1	0	0	1	0	4
Guidoboni et al 2001	1	1	1	1	1	1	1	0	7
Huang et al 2018	0	0	1	1	1	1	1	0	5
Lee et al 2010	1	1	0	1	0	0	1	0	4
Markl et al 2017	1	0	1	0	1	0	1	0	4
Berntsson et al 2017	1	1	1	1	0	0	1	0	5
Prall et al 2004	1	1	1	1	0	1	1	0	6
Richards et al 2014	1	1	1	1	Not clear	0	1	1	6
Salama et al 2012	1	1	1	1	0	0	1	1	6
Sellitto et al 2011	1	0	0	0	Not clear	0	1	1	3
Siniorope et al 2009	0	0	0	1	0	1	1	0	3
Xu et al 2013	1	0	1	1	Not clear	0	1	1	5
Yoon et al 2012	0	0	1	1	1	1	1	0	5
Zeestraten et al 2014	1	0	1	1	1	1	1	1	7
Anitei et al 2014	0	1	1	0	Not clear	0	1	0	3
Cianchi et al 2002	1	0	1	1	Not clear	0	1	0	4
Reimers et al 2014	1	0	1	1	1	1	0	0	5
Ling et al 2014	1	0	1	1	1	1	1	0	6
Szynglarewicz et al 2007	1	0	1	1	Not clear	0	1	0	4
